# Supplementary material for: Entrevista a Pedro Castro, consejero delegado de Aitana
Source: Springer Nature journal article supplement (doi:10.1186/1471-2105-12-207), 2008-01-01

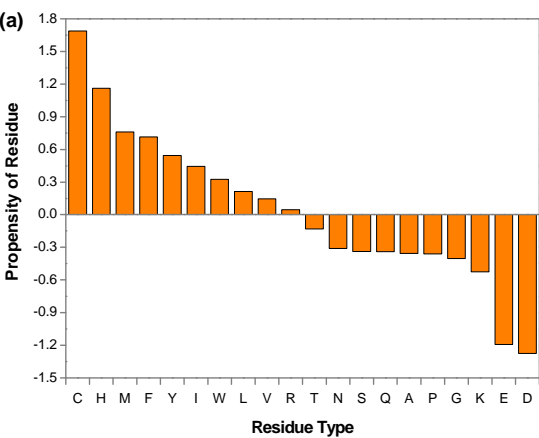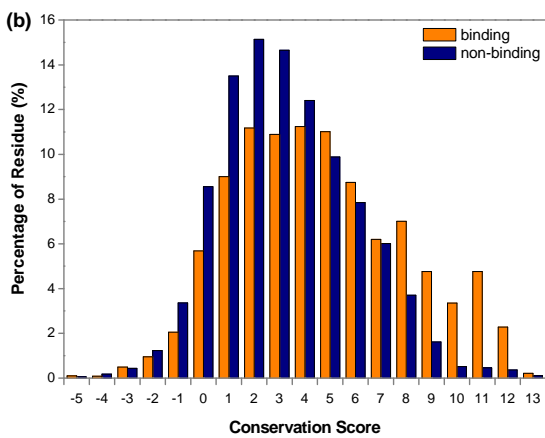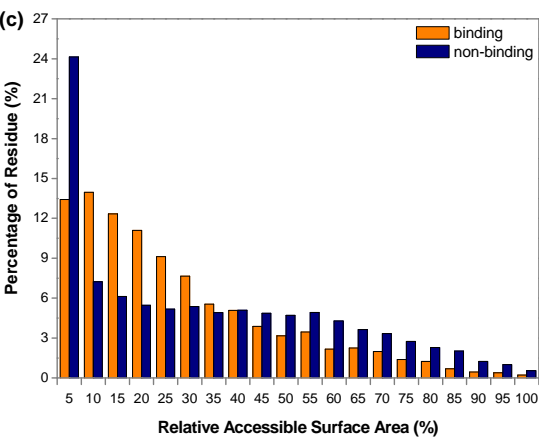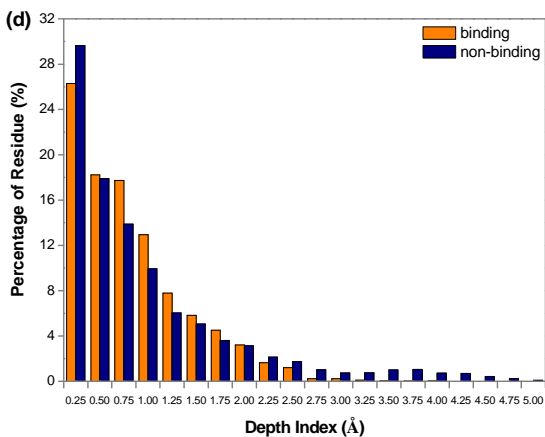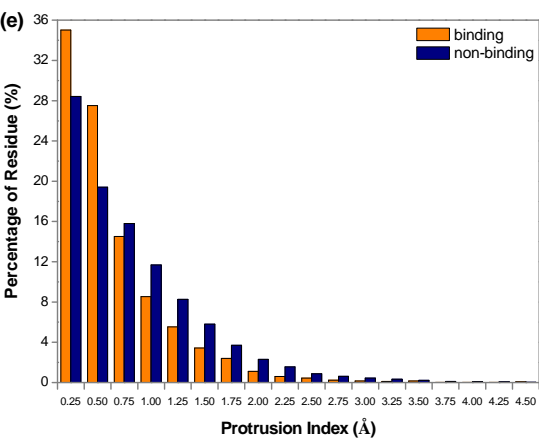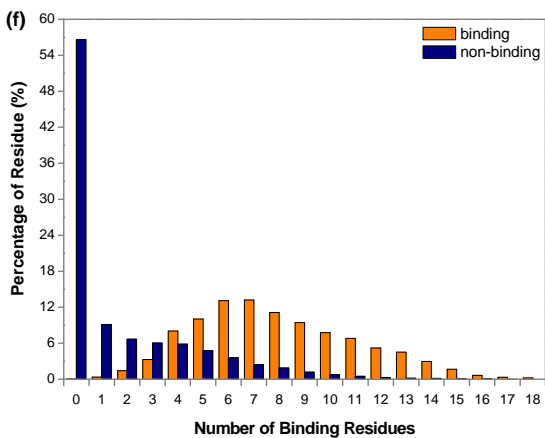

Supplement: 12859_2010_4590_MOESM4_ESM.pdf [file 12859_2010_4590_MOESM4_ESM.pdf]
